# Supplementary material
Source: publisher figshare collection journal article supplement (https://f1000.figshare.com/ndownloader/files/1134495)
Supplement: Supplementary file 1 [file 1134495]

Replicates	mRNA	DMSO	TCL	KTZ 50 uM TCL	KTZ 10 uM TCL	KTZ 1 uM TCL
1	CYP3A51	8.84	23.8	4.54	19.0	36.4
2	CYP3A51	5.17	44.2	3.95	25.1	31.1
3	CYP3A51	5.01	58.6	14.4	21.9	15.2
4	CYP3A51	7.70	38.1	13.7	19.4	12.5
5	CYP3A51	6.72	41.7	7.82	20.9	21.3
6	CYP3A51	8.31	53.5	6.48	18.4	23.0
1	B2M	3.24E+03	2.02E+03	1.21E+03	2.12E+03	2.46E+03
2	B2M	2.55E+03	4.29E+03	7.85E+02	2.44E+03	2.51E+03
3	B2M	1.62E+03	2.39E+03	2.87E+03	2.32E+03	9.00E+02
4	B2M	1.64E+03	1.90E+03	2.78E+03	1.28E+03	1.36E+03
5	B2M	1.83E+03	2.06E+03	1.55E+03	1.62E+03	1.10E+03
6	B2M	2.51E+03	2.46E+03	1.23E+03	1.63E+03	1.47E+03
